# Supplementary material
Source: PubMed Central journal article supplement (PMC5600165)
Supplement: NIHMS892243-supplement-supplement_1.pdf [file NIHMS892243-supplement-supplement_1.pdf]

**APPENDIX: SUPPLEMENTAL TABLES**

Table A.1: Description of Study Participants by Race and Case Status, Expanded Case Definition

Table A.2. Description of Study Participants by Race and Case Status, Laparoscopy Case Definition

Table A.3. Fraction of Tubal Factor Infertility (TFI) Attributable to Chlamydia, Adjusted for Selected Covariates, by Race

Table A.1. Description of Study Participants by Race and Case Status, Expanded Case Definition<sup>a</sup>

| Characteristic                                       | All Participants |                  |                       | Black Race      |                 |                       | Non-Black Race <sup>b</sup> |                  |                       |
|------------------------------------------------------|------------------|------------------|-----------------------|-----------------|-----------------|-----------------------|-----------------------------|------------------|-----------------------|
|                                                      | Cases            | Controls         | <i>p</i> <sup>c</sup> | Cases           | Controls        | <i>p</i> <sup>c</sup> | Cases                       | Controls         | <i>p</i> <sup>c</sup> |
|                                                      | (n=231)<br>n (%) | (n=540)<br>n (%) |                       | (n=57)<br>n (%) | (n=60)<br>n (%) |                       | (n=174)<br>n (%)            | (n=480)<br>n (%) |                       |
| <b>Study site</b>                                    |                  |                  | 0.672                 |                 |                 | 0.768                 |                             |                  | 0.146                 |
| Birmingham                                           | 81 (35.1)        | 198 (36.7)       |                       | 31 (54.4)       | 31 (51.7)       |                       | 50 (28.7)                   | 167 (34.8)       |                       |
| Pittsburgh                                           | 150 (64.9)       | 342 (63.3)       |                       | 26 (45.6)       | 29 (48.3)       |                       | 124 (71.3)                  | 313 (65.2)       |                       |
| <b>Age (median, IQR)</b>                             | 33 (29-36)       | 31 (29-35)       | <b>0.044</b>          | 33 (29-38)      | 32 (28-37)      | 0.396                 | 32 (29-36)                  | 31 (29-35)       | 0.111                 |
| <b>Household income</b>                              |                  |                  | <b>0.005</b>          |                 |                 | <b>0.024</b>          |                             |                  | 0.359                 |
| <\$50,000                                            | 57 (27.4)        | 66 (13.2)        |                       | 27 (56.2)       | 15 (30.6)       |                       | 30 (18.7)                   | 51 (11.3)        |                       |
| \$50,000 - <\$75,000                                 | 34 (16.3)        | 116 (23.1)       |                       | 6 (12.5)        | 11 (22.4)       |                       | 28 (17.5)                   | 105 (23.2)       |                       |
| ≥\$75,000                                            | 117 (56.2)       | 319 (63.7)       |                       | 15 (31.2)       | 23 (46.9)       |                       | 102 (63.7)                  | 296 (65.5)       |                       |
| <b>Education</b>                                     |                  |                  | 0.117                 |                 |                 | 0.433                 |                             |                  | 0.599                 |
| <Bachelor's degree                                   | 95 (41.1)        | 177 (32.8)       |                       | 33 (57.9)       | 31 (51.7)       |                       | 62 (33.6)                   | 146 (30.4)       |                       |
| Bachelor's / 4-yr degree                             | 70 (30.3)        | 202 (37.4)       |                       | 14 (24.6)       | 15 (25.0)       |                       | 56 (32.2)                   | 187 (39.0)       |                       |
| Master's degree or higher                            | 66 (28.6)        | 161 (29.8)       |                       | 10 (17.5)       | 14 (23.3)       |                       | 56 (32.2)                   | 147 (30.6)       |                       |
| <b>Duration of infertility, months (median, IQR)</b> | 31 (17-63)       | 23 (15-38)       | <b>&lt;0.001</b>      | 40 (24-71)      | 25 (17-54)      | <b>0.034</b>          | 26 (16-58)                  | 22 (15-37)       | <b>0.002</b>          |
| <b>History of intrauterine pregnancy without ART</b> | 90 (39.0)        | 188 (34.8)       | 0.273                 | 29 (50.9)       | 31 (51.7)       | 0.932                 | 61 (35.1)                   | 157 (32.7)       | 0.574                 |
| <b>History of live birth without ART</b>             | 47 (20.3)        | 101 (18.7)       | 0.596                 | 18 (31.6)       | 15 (25.0)       | 0.431                 | 29 (16.7)                   | 86 (17.9)        | 0.712                 |
| <b>History of smoking</b>                            | 83 (35.9)        | 169 (31.3)       | 0.209                 | 18 (33.3)       | 14 (23.3)       | 0.293                 | 64 (36.8)                   | 156 (32.3)       | 0.300                 |

|                                                    |            |            |                  |            |            |              |            |            |              |
|----------------------------------------------------|------------|------------|------------------|------------|------------|--------------|------------|------------|--------------|
| History of marijuana use                           | 119 (51.5) | 250 (46.3) | 0.184            | 36 (63.2)  | 29 (48.3)  | 0.107        | 83 (47.7)  | 221 (46.0) | 0.707        |
| History of other illicit drug use                  | 37 (16.0)  | 64 (11.8)  | 0.116            | 10 (17.5)  | 3 (5.0)    | <b>0.031</b> | 27 (15.5)  | 61 (12.7)  | 0.352        |
| History of combined hormonal contraception         | 190 (83.3) | 486 (90.5) | <b>0.005</b>     | 40 (71.4)  | 54 (90.0)  | <b>0.011</b> | 150 (87.2) | 432 (90.6) | 0.215        |
| History of progestin-only contraception            | 43 (18.9)  | 80 (15.1)  | 0.185            | 18 (32.1)  | 18 (30.0)  | 0.803        | 25 (14.6)  | 62 (13.2)  | 0.634        |
| Age at first vaginal sex (median, IQR)             | 17 (16-19) | 18 (16-20) | <b>0.030</b>     | 16 (15-18) | 16 (15-18) | 0.358        | 18 (16-20) | 18 (16-20) | 0.342        |
| Lifetime number of male sex partners (median, IQR) | 5 (3-9)    | 5 (2-8)    | <b>0.030</b>     | 6 (4-10)   | 7 (4-10)   | 0.859        | 5 (2-9)    | 4 (2-7)    | 0.109        |
| History of chlamydia                               | 35 (15.1)  | 44 (8.1)   | <b>0.003</b>     | 20 (35.1)  | 17 (28.3)  | 0.432        | 15 (8.6)   | 27 (5.6)   | 0.167        |
| History of gonorrhea                               | 9 (3.9)    | 12 (2.2)   | 0.191            | 8 (14.0)   | 8 (13.3)   | 0.912        | 1 (0.6)    | 4 (0.8)    | 1.000        |
| History of bacterial vaginosis                     | 21 (9.1)   | 27 (5.0)   | <b>0.031</b>     | 13 (22.8)  | 14 (23.3)  | 0.946        | 8 (4.6)    | 13 (2.7)   | 0.226        |
| History of trichomoniasis                          | 16 (6.9)   | 9 (1.7)    | <b>&lt;0.001</b> | 10 (17.5)  | 7 (11.7)   | 0.367        | 6 (3.4)    | 2 (0.4)    | <b>0.006</b> |
| History of PID                                     | 19 (8.2)   | 14 (2.6)   | <b>&lt;0.001</b> | 11 (19.3)  | 5 (8.3)    | 0.084        | 8 (4.6)    | 9 (1.9)    | 0.090        |
| History of ectopic pregnancy                       | 43 (18.6)  | N/A        | N/A              | 18 (31.6)  | N/A        | N/A          | 25 (14.4)  | N/A        | N/A          |
| Surgically-confirmed endometriosis                 | 54 (23.4)  | 80 (14.8)  | <b>0.004</b>     | 9 (15.8)   | 6 (10.0)   | 0.349        | 45 (25.9)  | 74 (15.4)  | <b>0.002</b> |
| History of abdominal / pelvic surgery              | 68 (29.4)  | 100 (18.5) | <b>&lt;0.001</b> | 21 (36.8)  | 14 (23.3)  | 0.112        | 47 (27.0)  | 86 (17.9)  | <b>0.011</b> |
| History of abdominal / pelvic inflammation         | 22 (9.5)   | 37 (6.8)   | 0.201            | 5 (8.8)    | 0 (0.0)    | <b>0.025</b> | 17 (9.8)   | 37 (7.7)   | 0.397        |

IQR, interquartile range; ART, assisted reproductive technology; PID, pelvic inflammatory disease

<sup>a</sup> TFI case = unilateral or bilateral fallopian tube blockage or other tubal abnormalities on HSG, or prior history of tubal ectopic pregnancy, hydrosalpinx, or surgery to repair blocked tubes; Control = bilateral patent tubes and no other tubal abnormalities on HSG and no prior history of tubal ectopic pregnancy or surgery to repair blocked tubes

<sup>b</sup> Non-black race included: 628 white, 20 Asian, 6 other race

<sup>c</sup> Chi-square, Fisher's Exact, or Cochran-Mantel-Haenszel test for categorical variables and Wilcoxon Mann Whitney test for continuous variables. Statistically significant ( $P < 0.05$ ) results are indicated by bold print.

Table A.2. Description of Study Participants by Race and Case Status, Laparoscopy Case Definition<sup>a</sup>

| Characteristic                                       | All Participants |                 |                       | Black Race      |                 |                       | Non-Black Race <sup>b</sup> |                 |                       |
|------------------------------------------------------|------------------|-----------------|-----------------------|-----------------|-----------------|-----------------------|-----------------------------|-----------------|-----------------------|
|                                                      | Cases            | Controls        | <i>p</i> <sup>c</sup> | Cases           | Controls        | <i>p</i> <sup>c</sup> | Cases                       | Controls        | <i>p</i> <sup>c</sup> |
|                                                      | (n=81)<br>n (%)  | (n=88)<br>n (%) |                       | (n=15)<br>n (%) | (n=16)<br>n (%) |                       | (n=66)<br>n (%)             | (n=72)<br>n (%) |                       |
| <b>Study site</b>                                    |                  |                 | <b>0.003</b>          |                 |                 | 0.654                 |                             |                 | <b>&lt;0.001</b>      |
| Birmingham                                           | 45 (55.6)        | 68 (77.3)       |                       | 13 (86.7)       | 12 (75.0)       |                       | 32 (48.5)                   | 56 (77.8)       |                       |
| Pittsburgh                                           | 36 (44.4)        | 20 (22.7)       |                       | 2 (13.3)        | 4 (25.0)        |                       | 34 (51.5)                   | 16 (22.2)       |                       |
| <b>Age (median, IQR)</b>                             | 33 (29-36)       | 32 (30-36)      | 0.932                 | 36 (30-39)      | 36 (31-39)      | 0.921                 | 32 (29-35)                  | 32 (29-35)      | 0.836                 |
| <b>Household income</b>                              |                  |                 | 0.431                 |                 |                 | 0.774                 |                             |                 | 0.298                 |
| <\$50,000                                            | 11 (16.2)        | 11 (14.9)       |                       | 2 (20.0)        | 5 (38.5)        |                       | 9 (15.5)                    | 6 (9.8)         |                       |
| \$50,000 - <\$75,000                                 | 14 (20.6)        | 11 (14.9)       |                       | 2 (20.0)        | 0 (0.0)         |                       | 12 (20.7)                   | 11 (18.0)       |                       |
| ≥\$75,000                                            | 43 (63.2)        | 52 (70.3)       |                       | 6 (60.0)        | 8 (61.5)        |                       | 37 (63.8)                   | 44 (72.1)       |                       |
| <b>Education</b>                                     |                  |                 | 0.599                 |                 |                 | 0.931                 |                             |                 | 0.569                 |
| <Bachelor's degree                                   | 31 (38.3)        | 29 (32.9)       |                       | 8 (53.3)        | 8 (50.0)        |                       | 23 (34.8)                   | 21 (29.2)       |                       |
| Bachelor's / 4-yr degree                             | 23 (28.4)        | 41 (46.6)       |                       | 2 (13.3)        | 4 (25.0)        |                       | 21 (31.8)                   | 37 (51.4)       |                       |
| Master's degree or higher                            | 27 (33.3)        | 18 (20.4)       |                       | 5 (33.3)        | 4 (25.0)        |                       | 22 (33.3)                   | 14 (19.4)       |                       |
| <b>Duration of infertility, months (median, IQR)</b> | 32 (18-74)       | 23 (18-39)      | <b>0.018</b>          | 36 (13-77)      | 37 (16-48)      | 0.844                 | 32 (19-73)                  | 22 (18-35)      | <b>0.010</b>          |
| <b>History of intrauterine pregnancy without ART</b> | 33 (40.7)        | 40 (45.4)       | 0.538                 | 8 (53.3)        | 6 (37.5)        | 0.384                 | 25 (37.9)                   | 34 (47.2)       | 0.271                 |
| <b>History of live birth without ART</b>             | 17 (21.0)        | 21 (23.9)       | 0.656                 | 4 (26.7)        | 4 (25.0)        | >0.999                | 13 (19.7)                   | 17 (23.6)       | 0.579                 |
| <b>History of smoking</b>                            | 27 (33.3)        | 21 (23.9)       | 0.174                 | 3 (20.0)        | 1 (6.2)         | 0.549                 | 24 (36.4)                   | 20 (27.8)       | 0.283                 |

|                                                    |            |            |              |            |            |              |            |            |              |
|----------------------------------------------------|------------|------------|--------------|------------|------------|--------------|------------|------------|--------------|
| History of marijuana use                           | 42 (51.8)  | 42 (47.7)  | 0.592        | 7 (46.7)   | 6 (37.5)   | 0.605        | 35 (53.0)  | 36 (50.0)  | 0.722        |
| History of other illicit drug use                  | 8 (9.9)    | 15 (17.0)  | 0.174        | 0 (0.0)    | 2 (12.5)   | 0.484        | 8 (12.1)   | 13 (18.1)  | 0.332        |
| History of combined hormonal contraception         | 70 (87.5)  | 84 (95.4)  | 0.062        | 9 (64.3)   | 16 (100.0) | <b>0.014</b> | 61 (92.4)  | 68 (94.4)  | 0.737        |
| History of progestin-only contraception            | 13 (16.2)  | 8 (9.3)    | 0.178        | 3 (21.4)   | 2 (12.5)   | 0.642        | 10 (15.1)  | 6 (8.6)    | 0.234        |
| Age at first vaginal sex (median, IQR)             | 17 (16-19) | 18 (17-20) | <b>0.023</b> | 17 (16-19) | 18 (15-20) | 0.873        | 17 (16-20) | 18 (17-20) | <b>0.016</b> |
| Lifetime number of male sex partners (median, IQR) | 5 (3-9)    | 5 (2-8)    | 0.388        | 5 (3-7)    | 6 (4-9)    | 0.403        | 5 (3-9)    | 4 (2-8)    | 0.203        |
| History of chlamydia                               | 11 (13.6)  | 4 (4.5)    | <b>0.039</b> | 4 (26.7)   | 3 (18.7)   | 0.685        | 7 (10.6)   | 1 (1.4)    | <b>0.028</b> |
| History of gonorrhea                               | 3 (3.7)    | 1 (1.1)    | 0.351        | 2 (13.3)   | 1 (6.2)    | 0.600        | 1 (1.5)    | 0 (0.0)    | 0.478        |
| History of bacterial vaginosis                     | 6 (7.4)    | 2 (2.3)    | 0.155        | 2 (13.3)   | 2 (12.5)   | 1.000        | 4 (6.1)    | 0 (0.0)    | 0.050        |
| History of trichomoniasis                          | 5 (6.2)    | 0 (0.0)    | <b>0.024</b> | 2 (13.3)   | 0 (0.0)    | 0.226        | 3 (4.6)    | 0 (0.0)    | 0.107        |
| History of PID                                     | 5 (6.2)    | 2 (2.3)    | 0.262        | 1 (6.7)    | 2 (12.5)   | 1.000        | 4 (6.1)    | 0 (0.0)    | 0.050        |
| History of ectopic pregnancy                       | 11 (13.6)  | 1 (1.1)    | <b>0.002</b> | 4 (26.7)   | 0 (0.0)    | <b>0.043</b> | 7 (10.6)   | 1 (1.4)    | <b>0.028</b> |
| Surgically-confirmed endometriosis                 | 42 (51.8)  | 62 (70.4)  | <b>0.013</b> | 3 (20.0)   | 8 (50.0)   | 0.081        | 39 (59.1)  | 54 (75.0)  | <b>0.047</b> |
| History of abdominal / pelvic surgery              | 28 (34.6)  | 17 (19.3)  | <b>0.025</b> | 4 (26.7)   | 7 (43.7)   | 0.320        | 24 (36.4)  | 10 (13.9)  | <b>0.002</b> |
| History of abdominal / pelvic inflammation         | 10 (12.3)  | 2 (2.3)    | <b>0.001</b> | 2 (13.3)   | 1 (6.2)    | 0.600        | 8 (12.1)   | 1 (1.4)    | <b>0.014</b> |

IQR, interquartile range; ART, assisted reproductive technology; PID, pelvic inflammatory disease

<sup>a</sup> TFI case = laparoscopy showing evidence of tubal damage; Control = laparoscopy within one year of study showing no evidence of tubal damage

<sup>b</sup> Non-black race included: 134 white, 4 Asian

<sup>c</sup> Chi-square, Fisher's Exact, or Cochran-Mantel-Haenszel test for categorical variables and Wilcoxon Mann Whitney test for continuous variables. Statistically significant ( $P < 0.05$ ) results are indicated by bold print.

**Table A.3. Fraction of Tubal Factor Infertility (TFI)<sup>a</sup> Attributable to Chlamydia, Adjusted for Selected Covariates, by Race**

| Definition of <i>C. trachomatis</i> Seropositivity | Adjusted PAF (95% CI) |                        |
|----------------------------------------------------|-----------------------|------------------------|
|                                                    | Race                  |                        |
|                                                    | Black <sup>b</sup>    | Non-Black <sup>c</sup> |
| Positive by Medac IgG MOMP                         | 1% (-36%, 24% )       | 3% (-1%, 6% )          |
| Positive by EB-ELISA (IgG1 or IgG3)                | 1% (-100%, 43% )      | 4% (0%, 9% )           |
| Positive by EB-ELISA IgG1                          | -12% (-100%, 35% )    | 3% (0%, 6% )           |
| Positive by EB-ELISA IgG3                          | -18% (-93%, 19% )     | 5% (2%, 9% )           |
| Positive by Medac IgG MOMP or EB-ELISA             | 5% (-100%, 48% )      | 4% (-2%, 8% )          |
| Positive by Medac IgG MOMP and EB-ELISA            | 0% (-38%, 23% )       | 4% (1%, 7% )           |

PAF, population attributable fraction; CI, confidence interval; MOMP, major outer membrane protein; EB, elementary body; ELISA, enzyme-linked immunosorbent assay

<sup>a</sup> Tubal Factor Infertility (TFI) defined by hysterosalpingogram (HSG) case definition; TFI case = unilateral or bilateral fallopian tube blockage on HSG; Control = bilateral patent tubes and no other tubal abnormalities on HSG and no prior history of tubal ectopic pregnancy or surgery to repair blocked tubes

<sup>b</sup> PAF estimates adjusted for study site, age, income, illicit drug use, combined hormonal contraceptive use

<sup>c</sup> PAF estimates adjusted for study site, age, income, history of trichomoniasis, endometriosis
